# Supplementary material for: De novo truncating variants of TRIM8 and atypical neuro-renal syndrome: a case report and literature review
Source: Springer Nature journal article supplement (doi:10.1186/s13052-023-01453-4), 2023-04-15
Supplement: MOESM1 [file 25246940]

**Additional file 1. Clinical characteristics of the 22 previous cases and present case with *TRIM8* variant**

| No. | Sex            | Epilepsy | Age<br>1 <sup>a</sup> | DD <sup>b</sup> | Facial features                                                                                                    | Brain magnetic<br>resonance imaging                                                                                                         | Others                                        | Renal<br>disease                   | Age<br>2 <sup>c</sup> | Renal biopsy    | Renal<br>outcome | <i>TRIM8</i> variants | Ref  |
|-----|----------------|----------|-----------------------|-----------------|--------------------------------------------------------------------------------------------------------------------|---------------------------------------------------------------------------------------------------------------------------------------------|-----------------------------------------------|------------------------------------|-----------------------|-----------------|------------------|-----------------------|------|
| 1   | M <sup>d</sup> | Yes      | 0.4                   | Yes             | Mild facial<br>features, long<br>philtrum                                                                          | Widespread<br>moderate cortical<br>atrophy, scattered<br>T2 signal increase<br>in the white matter                                          | Hypospadias                                   | None                               | NA                    | NA <sup>e</sup> | NA               | p.Ala374Argfs*16      | (10) |
| 2   | M              | Yes      | 1.8                   | Yes             | synophridia,<br>sunken eyes, long<br>philtrum                                                                      | NM <sup>f</sup>                                                                                                                             | None                                          | None                               | NA                    | NA              | NA               | p.Gln423*             | (9)  |
| 3   | M              | Yes      | 0.2                   | Yes             | Microcephaly,<br>upper-slanted<br>palpebral fissures,<br>long-arched<br>eyebrows, thin<br>lips, large ear<br>lobes | Normal                                                                                                                                      | Hip dislocation,<br>enuresis,<br>constipation | None                               | NA                    | NA              | NA               | p.Cys367Trpfs*43      | (8)  |
| 4   | F <sup>g</sup> | Yes      | 3.4                   | Yes             | None                                                                                                               | Patchy confluent<br>regions of T2<br>hyperintensity with<br>small cysts in the<br>frontal and<br>peritrigonal white<br>matter on both sides | Cheerful<br>disposition                       | Nephrotic-<br>range<br>proteinuria | NM                    | None            | NM               | p.Ser444*             | (9)  |

|   |   |     |     |     |                                               |                                                                                                                                             |                                         |                             |     |                                                            |                        |                   |     |
|---|---|-----|-----|-----|-----------------------------------------------|---------------------------------------------------------------------------------------------------------------------------------------------|-----------------------------------------|-----------------------------|-----|------------------------------------------------------------|------------------------|-------------------|-----|
| 5 | F | Yes | 1.8 | Yes | Microcephalic, left simian crease, fine hair  | Normal brain structures with hypomyelination at the anterior limb of the bilateral internal capsule and bifrontal lobes of the white matter | None                                    | Proteinuria                 | 0.7 | None                                                       | Spontaneously resolved | p.Gln459*         | (9) |
| 6 | F | Yes | 2   | Yes | Gingival overgrowth, synophrys, long philtrum | Delayed myelination                                                                                                                         | Long extremities, joint hyperlaxity     | Nephrotic-range proteinuria | 4   | Mesangial glomerulonephritis with nonspecific IgM deposits | NM                     | p.Tyr446*         | (9) |
| 7 | M | Yes | 2.4 | Yes | NM                                            | Normal                                                                                                                                      | None                                    | Nephrotic-range proteinuria | 2.4 | FSGS                                                       | ESRD                   | p.Tyr460*         | (7) |
| 8 | M | Yes | 5   | Yes | NM                                            | Identified an old infarct, other brain structures appeared normal                                                                           | Right-side squint, chronic constipation | Nephrotic-range proteinuria | 2.2 | FSGS                                                       | ESRD                   | p.Tyr400ArgfsTer2 | (6) |
| 9 | F | No  | NA  | No  | None                                          | Normal                                                                                                                                      | None                                    | nephrotic-range proteinuria | 3   | FSGS; cystic dilatation of distal tubules                  | ESRD                   | p.Tyr487*         | (5) |

|               |          |     |               |               |                                                                                                                     |                                                                                          |                                                                                                                                     |                                                                                          |                     |                                                                           |                                   |                                                                                                                                      |      |
|---------------|----------|-----|---------------|---------------|---------------------------------------------------------------------------------------------------------------------|------------------------------------------------------------------------------------------|-------------------------------------------------------------------------------------------------------------------------------------|------------------------------------------------------------------------------------------|---------------------|---------------------------------------------------------------------------|-----------------------------------|--------------------------------------------------------------------------------------------------------------------------------------|------|
| 10-19         | 4M<br>6F | Yes | 1.5 to<br>4.5 | Yes           | Broad nasal<br>bridge, broad<br>forehead,<br>plagiocephaly,<br>low-set ears, high<br>arched palate,<br>micrognathia | Except for 1 normal<br>case, the others<br>showed different<br>degrees of<br>abnormality | Increased bladder<br>pressure, hyperopia,<br>astigmatism,<br>amblyopia,<br>sensorineural<br>hearing loss,<br>scoliosis              | 8 cases of<br>nephrotic<br>syndrome,<br>2 cases of<br>nephrotic-r<br>ange<br>proteinuria | Birth<br>to<br>13.7 | Two cases of<br>diffuse<br>mesangial<br>sclerosis, the<br>others are FSGS | ESRD                              | p.Phe388Serfs*2,<br>p.Gly401*,<br>p.Gln411*,<br>p.Gln414*,<br>p.Gln423*,<br>p.Gln445*,<br>p.Tyr460*,<br>Three cases are<br>p.Gln459* | (4)  |
| 20<br>(twins) | M        | No  | NA            | Yes<br>(mild) | None                                                                                                                | NM                                                                                       | Both hypotonia,<br>Tourette's<br>syndrome,<br>preserved verbal<br>intelligence<br>quotient, difficulties<br>with fine<br>movements. | Both had<br>nephrotic-r<br>ange<br>proteinuria                                           | 6                   | FSGS                                                                      | ESRD                              | p.Tyr487*                                                                                                                            | (4)  |
| 21            | F        | No  | NA            | Yes<br>(mild) | None                                                                                                                | Normal                                                                                   | 2 convulsions<br>associated with<br>hypertension<br>(electroencephalogr<br>-am results were<br>normal)                              | Nephrotic-<br>range<br>proteinuria                                                       | 3.1                 | FSGS                                                                      | ESRD                              | p.Tyr487                                                                                                                             | (11) |
| 22            | F        | No  | NA            | No            | None                                                                                                                | NM                                                                                       | None                                                                                                                                | Nephrotic-<br>range<br>proteinuria                                                       | 3.3                 | Glomerular-<br>segmental<br>mesangial                                     | Proteinuria<br>decreased<br>after | p.Gln485                                                                                                                             | (11) |

|    |   |    |    |    |                                                                                        |                                                                                                                                                                                           |                                                                              |                             |   | proliferative lesions                    | treatment                      |           |              |
|----|---|----|----|----|----------------------------------------------------------------------------------------|-------------------------------------------------------------------------------------------------------------------------------------------------------------------------------------------|------------------------------------------------------------------------------|-----------------------------|---|------------------------------------------|--------------------------------|-----------|--------------|
| 23 | M | No | NA | No | Low-set ears, micrognathia, thin lips, wide eye distance, stubby neck, large ear lobes | Slightly wider bilateral frontal extracerebral space, the left lateral ventricle is slightly fuller than the right lateral ventricle, and presence of an arachnoid cyst or cisterna magna | Reduced kidney size, hyperlipidemia, neurogenic bladder, astigmatism, myopia | Nephrotic-range proteinuria | 6 | FSGS; cystic dilatation of renal tubules | Stage 3 chronic kidney disease | p.Trp495* | Present case |

<sup>a</sup>Age 1: age at the time of onset of epilepsy (year)

<sup>b</sup>DD: developmental delay

<sup>c</sup>Age 2: age at the time of onset of renal disease (year)

<sup>d</sup>M: male

<sup>e</sup>NA: not applicable

<sup>f</sup>NM: not mentioned

<sup>g</sup>F: female
